1 **Clinical characteristics and valve lesions in rheumatic heart disease among children admitted to a selected**  
2 **tertiary teaching hospital in eastern Ethiopia.**

3 **Authors**

4 **Temesgen Teferi Libe<sup>1\*</sup>, Yunus Edris Kelil<sup>1</sup>, Samrawit Abebaw Tegene<sup>2</sup>, Faisal Abdi<sup>2</sup>, Kibrom**

5 **Hailemariam Mesfin<sup>3</sup>**

6 **Affiliations:**

7 <sup>1</sup> Department of Pediatrics and Child Health, College of Health and Medical Sciences, Haramaya University,  
8 Harar, Ethiopia.

9 <sup>2</sup>Hararghe Health Research, Haramaya University, Harar, Ethiopia.

10 <sup>3</sup>Maedot Charity Organization, Mekelle, Ethiopia

11 **\*Corresponding author:** Temesgen Teferi Libe (MD), School of Medicine, College of Health and Medical  
12 Sciences, Haramaya University Harar, Ethiopia, Email: [libe.temesgen.temesgen@gmail.com](mailto:libe.temesgen.temesgen@gmail.com), Tel:  
13 +251913730243, P.O Box 235 Harar, Ethiopia.

## Abstract

**Background:** Rheumatic heart disease remains a significant public health concern, especially among children in resource-limited settings like Ethiopia. Despite effective prevention strategies, RHD persists due to factors such as poverty and limited healthcare access. Understanding the clinical characteristics and valve lesions of rheumatic heart disease is crucial for improving diagnosis and management.

**Objective:** This study aimed to characterize the clinical features and valve lesions in children with rheumatic heart disease admitted to a tertiary teaching hospital in Eastern Ethiopia.

**Methods:** A hospital-based cross-sectional study was conducted from January 1 to December 31, 2021, at Hiwot Fana Comprehensive Specialized Hospital. Data were collected from medical records, clinical assessments, echocardiography reports, and laboratory tests. Descriptive statistics were used for analysis.

**Results:** A total of 39 children with rheumatic heart disease were included, predominantly females (71.8%). Shortness of breath (53.9%) and cough (38.5%) were common presenting symptoms. Acute decompensated heart failure (ADHF) was prevalent (89.7%). Mitral regurgitation (94.9%) and aortic regurgitation (66.7%) were frequent valve lesions. Other findings included mitral stenosis (56.4%) and left atrial enlargement (86.1%). Laboratory results showed mean hemoglobin of 10.29 g/dL and mean ESR of 45 mm/hr.

**Conclusions:** This study highlights the burden of RHD in Eastern Ethiopia, with advanced disease at presentation. Mitral and aortic valve lesions were predominant, emphasizing the need for early detection and comprehensive management strategies. Collaboration among healthcare providers and policymakers is essential to address the challenges of RHD in resource-limited settings.

**Keywords:** Rheumatic heart disease, clinical characteristics, valve lesions, Eastern Ethiopia

## 34 **Introduction**

## 35 **Background**

36 Rheumatic heart disease (RHD) remains a significant public health threat, particularly for  
37 children in developing countries like Ethiopia. It is a debilitating condition primarily affecting  
38 the heart valves, particularly the mitral and aortic valves, resulting from acute rheumatic fever  
39 (ARF), a complication of untreated streptococcal pharyngitis(1). The global burden of RHD is  
40 immense, with developing nations disproportionately affected due to factors like poverty,  
41 overcrowding, and limited access to healthcare(2, 3, 4, 5, 6, 7, 8, 9).

42 RHD is a significant contributor to the overall burden of acquired heart diseases worldwide,  
43 accounting for nearly half of all cardiovascular problems(10). In 2015 alone, it was responsible  
44 for over 10 million disability-adjusted life-years and over 300,000 premature deaths(2). Despite  
45 the existence of effective prevention strategies, RHD continues to disproportionately affect  
46 developing countries. Here, untreated ARF often progresses to RHD(3, 4, 5, 6, 7, 8, 9, 10).

47 Patients with RHD often present with symptoms of heart failure, including shortness of breath,  
48 fatigue, and chest pain. In severe cases, RHD can lead to complications such as pulmonary  
49 arterial hypertension, arrhythmias, and infective endocarditis(11, 12). Echocardiography plays a  
50 crucial role in diagnosing RHD, determining the location, type, and severity of valve lesions, and  
51 identifying associated complications(11, 12, 13, 14).

52 Despite the substantial national burden of RHD, there is a scarcity of studies exploring the  
53 clinical characteristics and patterns of valve lesions in Ethiopia, particularly in the Eastern  
54 region. To our knowledge, no comprehensive research has been conducted in this specific

55 geographic area regarding valve lesion patterns and clinical characteristics. This study aims to  
56 address this critical knowledge gap by investigating RHD in Ethiopian children.

57 The lack of understanding concerning the specific clinical features and valve lesion patterns in  
58 this population hinders the development of tailored interventions, early detection, and optimal  
59 management of RHD. Healthcare providers, policymakers, and public health practitioners  
60 require a clearer picture to implement effective strategies for reducing the disease burden,  
61 associated morbidity, and mortality.

62 Therefore, this study aims to characterize the clinical features and valve lesion patterns in  
63 children with RHD. This knowledge will ultimately inform the development of evidence-based  
64 interventions and improved healthcare for this vulnerable population.

## 65 **Objectives**

### 66 **General Objective**

67 To determine the clinical characteristics and valve lesions in children with rheumatic heart  
68 disease admitted to a tertiary teaching hospital in eastern Ethiopia, from January 1 to December  
69 31, 2021.

### 70 **Specific objectives**

71 To describe the clinical characteristics of children admitted to a tertiary teaching hospital in  
72 eastern Ethiopia with a diagnosis of rheumatic heart disease.

73 To evaluate the patterns of valve lesions in children admitted to a tertiary teaching hospital in  
74 eastern Ethiopia with a diagnosis of rheumatic heart disease.

## 75 **Methods and Materials**

### 76 **Study area, design and period**

77 A hospital-based cross-sectional study design was used to prospectively study children admitted  
78 from January 1 to December 31, 2021 to pediatric ward and pediatrics ICU of Hiwot Fana  
79 Comprehensive Specialized Hospital (HFCSH). Hiwot Fana Comprehensive Specialized  
80 Hospital (HFCSH), Haramaya University's tertiary teaching hospital, is located in Harar and  
81 serves 5.8 million people, including the populations of Harari Region, Diredawa City  
82 Administration, Somali Region, and Eastern Hararghe Zone of Oromia Regional State. At  
83 HFCSH, Pediatric Ward and ICU accommodate 30 beds (6 in PICU and 24 in the Pediatric  
84 ward) with about 640 total admissions per year, among which about 79 had RHD diagnosis.  
85 (Health Management Information System data 2019; unpublished).

### 86 **Patient involvement**

87 Patients were not directly involved in the design of this study.

### 88 **Population and eligibility**

89 All children with RHD admitted to the pediatric ward and pediatric ICU of HFCSH from January  
90 1 to December 31, 2021, by excluding repeat admissions and disappeared cases before obtaining  
91 adequate information.

### 92 **Sample size determination and sampling technique**

93 Study population, and Sample size was calculated Using OpenEpi software by taking P=50%),  
94 with a 95% confidence level and the margin of error d=5% (0.05). The sample size was  
95 determined to be 384. However, during the one-year study period, approximately 67 children  
96 with RHD were admitted to the pediatric ward and ICU, representing 9.9% of the total 678

97 admissions. Thus, we decided to enroll all of these children to have more representative data.

98 [Fig 1]

99 Fig 1. Sampling procedure for the study Clinical characteristics and valve lesions in rheumatic  
100 heart disease.

### 101 **Data Collection Methods**

102 A comprehensive review of medical records for children with rheumatic heart disease (RHD)  
103 admitted to the pediatric ward and ICU at Hiwot Fana Comprehensive Tertiary Teaching  
104 Hospital between January 1 and December 31, 2021, was conducted. The review included  
105 demographic information, clinical history, presenting symptoms, laboratory results, chest X-ray  
106 findings, and echocardiography reports. This study was conducted using anonymized data. The  
107 authors did not have access to person-identifying information such as medical record number,  
108 phone number, or patient name.

109 An experienced team of pediatricians and cardiologists conducted standardized clinical  
110 assessments on each enrolled child (n= 39) from January 1 to December 31, 2021. These  
111 assessments included a thorough physical examination for cardiac symptom evaluation, vital sign  
112 measurement, and collection of additional clinical data.

113 Pediatric cardiologists performed echocardiographic assessments adhering to standardized  
114 protocols to identify valve lesions and their characteristics during the same period (January 1 –  
115 December 31, 2021). Additionally, laboratory data (complete blood count, ESR), chest X-ray,  
116 and ECG were obtained.

117 Prior to conducting assessments, parents and/or legal guardians had provided formal informed  
118 written consent.

119 **Study Variables and measurements**

120 The outcome variables of this study were patterns of valve lesions and clinical characteristics of  
121 RHD. Independent variables included; socio-demographic variables; age, sex, address, ethnicity.

122 **Data quality control**

123 The data collection tool was piloted on two RHD patients in the Jugol Hospital pediatric ward to  
124 assess its consistency, completeness, and ease of understanding. Two days of training were given  
125 to both the data collectors and supervisor. The principal investigator closely monitored the data  
126 collection process to ensure completeness, accuracy, and data collection consistency. During  
127 sessions, thorough checking was done before analyzing the filled questionnaires. Two separate  
128 individuals conducted double data entry. When any gap was identified, it was communicated  
129 with data collectors daily. Following data entry, the dataset was reviewed for completeness and  
130 any missing data points were addressed.

131 **Data Processing and Analysis**

132 After data collection, each questionnaire was checked thoroughly for completeness. The data was  
133 then coded using a standardized coding scheme and double-entered into EpiData version 3.1.  
134 Subsequently, the data was transferred to Stata version 14.2 for statistical analysis.  
135 Descriptive statistics, including frequency, proportions, means, and standard deviation were  
136 computed.

137 **Ethical consideration**

138 Ethical clearance was obtained from Haramaya University College of Health and Medical  
139 Sciences Institution Health Research Ethical Review Committee (with ethical approval ref.no:  
140 IHRERC/245/2020). An official letter was sent to Hiwot Fana Comprehensive Specialized  
141 Hospital. This study was conducted in accordance with the Declaration of Helsinki. Data

142 collection was started after the study protocol participants (mothers of children) under the age of  
143 18 years were reviewed and approved by the IRB of Haramaya University to provide informed  
144 consent on their own behalf.

145 Permissions were obtained from hospital managers/medical directors and after written or (verbal  
146 for those unable to read and write) informed consent was obtained from mothers of the baby. The  
147 purpose of the study was briefly explained to the children's mothers/care givers. Data that were  
148 collected from the participants were kept in secured and order to maintain confidentiality.  
149 Voluntary participation was ensured and participants were free to out.

## 150 **Result**

### 151 **Baseline Characteristics**

152 A total of 39 children with RHD were enrolled in the study. The majority (71.8%, n=28) were  
153 females, and the remaining participants (28.2%, n=11) were males. The mean age of the children  
154 was 10 years (SD  $\pm$  2.6 years). [Table 1]

155 Table 1 Baseline Characteristics of RHD patients

| <b>Sex</b> | <b>Frequency</b> | <b>Percentage</b> | <b>Age in years</b> |         |
|------------|------------------|-------------------|---------------------|---------|
| Male       | 11               | 28.21%            | <b>Mean</b>         | 10      |
| Female     | 28               | 71.79%            | <b>SD</b>           | 2.6     |
| Total      | 39               | 100%              | <b>(Min, Max)</b>   | (5, 14) |

### 159 **Clinical characteristics**

160 Fourteen children had a known diagnosis of RHD, and 25 were newly diagnosed. Shortness of  
161 breath (53.9%) was the most frequent presenting complaint, followed by cough (38.5%). Among



162 the 14 children with a known diagnosis of RHD, only 2 (14.3%) were adherent to secondary  
 163 prophylaxis, while 6 (42.9%) were non-adherent and the remaining 6 (42.9%) had never taken  
 164 prophylaxis. Shortness of breath (53.9%) was the most frequent presenting complaint, followed  
 165 by cough (38.5%) and other symptoms. [Table 2]

166 Table 2 clinical characteristics of RHD patients

| Chief Complaint     | RHD status |         | Adherence to prophylaxis |         |      |                        |    |       |
|---------------------|------------|---------|--------------------------|---------|------|------------------------|----|-------|
|                     | Freq       | Percent | Freq                     | Percent |      |                        |    |       |
| Cough               | 15         | 38.46   | New                      | 25      | 64.1 | Adherent               | 2  | 14.29 |
| Shortness of breath | 21         | 53.85   | Known                    | 14      | 35.9 | Not Adherent           | 6  | 42.86 |
| Other               | 3          | 7.69    |                          |         |      | Not taking prophylaxis | 6  | 42.86 |
| Total               | 39         | 100     | Total                    | 39      | 100  | Total                  | 14 | 100   |

167  
 168 Ten (25.6%) children had at least one comorbidity. The most frequent comorbidities were severe  
 169 acute malnutrition (5; 12.8%) and severe anemia (Hb < 7 gm/dl; 5; 12.8%).

170 A significant proportion of patients (35 out of 39, or 89.7%) presented with acute decompensated  
 171 heart failure (ADHF) upon admission.

172 The most frequent identified trigger was pneumonia, affecting 21 patients (60% of ADHF  
 173 patients). One patient (3% of ADHF patients) had atrial fibrillation as a possible contributing  
 174 factor. Four patients (11% of ADHF patients) experienced a recurrence of rheumatic disease,  
 175 potentially contributing to their heart failure. Five patients (14% of ADHF patients) had  
 176 confirmed or suspected infective endocarditis, which could have exacerbated their heart failure.

## 177 **Vital signs and Anthropometry**

178 The mean pulse rate was 115.25 beats per minute (bpm) with a standard deviation (SD) of 19.44  
179 bpm (range: 60-178 bpm). The mean respiratory rate was 37.46 breaths per minute (bpm) with  
180 an SD of 13.49 bpm (range: 18-72 bpm). The mean body temperature was 36.94°C (SD ±  
181 1.05°C; range: 32-38.7°C). Mean oxygen saturation on room air was 94.3% (SD ± 3.5%; range:  
182 86-99%). The mean body mass index (BMI) was 14.56 kg/m<sup>2</sup> (SD ± 3.1 kg/m<sup>2</sup>; range: 11.3-28.2  
183 kg/m<sup>2</sup>). [Table 3]

184 Table 3 Vital sign and BMI distribution of RHD patients

| <b>Variable</b>  | <b>Mean</b> | <b>SD</b> | <b>Min</b> | <b>Max</b> |
|------------------|-------------|-----------|------------|------------|
| Pulse rate       | 115.25      | 19.44     | 60         | 178        |
| Respiratory Rate | 37.46       | 13.49     | 18         | 72         |
| Temperature      | 36.94       | 1.05      | 32         | 38.7       |
| Saturation       | 94.3        | 3.5       | 86         | 99         |
| BMI              | 14.56       | 3.1       | 11.3       | 28.2       |

189 According to WHO Z-scores for age, 5 (12.8%) children were severely wasted (< -3 Z-score), 12  
190 (30.8%) were moderately wasted (-3 to -2 Z-score), 21 (53.8%) had normal weight (-2 to +2 Z-  
191 score), and 1 (2.6%) was overweight (> +2 Z-score). [Fig 2]

192 Fig 2. BMI for age distribution of RHD patients

## 193 **Chest examination**

194 At least one abnormal chest examination finding was present in 24 (61.5%) children. The most  
195 common findings were crepitations (41.0%), decreased or absent air entry (39.5%), dullness  
196 (39.5%), and wheezing (9.3%). [Table 4]

197 Table 4 Chest examination findings of RHD patients

| <b>Chest findings (N=39)</b> | <b>At least one finding</b> | <b>Crepitation</b> | <b>Decreased or absent air entry</b> | <b>Dullness</b> | <b>Wheezing</b> |
|------------------------------|-----------------------------|--------------------|--------------------------------------|-----------------|-----------------|
| Frequency                    | 24                          | 16                 | 17                                   | 17              | 4               |
| Percent                      | 61.54                       | 41.03              | 39.53                                | 39.53           | 9.3             |

198

### 199 Cardiac examination

200 The point of maximal impulse (PMI) was displaced downward and to the left in 28 (71.8%)  
 201 children, while it was in the normal position in 9 (23.1%) and on the left lower sternal border in  
 202 2 (5.1%). Apical heave (61.5%) and parasternal heave (56.4%) were the most frequent abnormal  
 203 cardiac examination findings. P2 heart sound was accentuated in 28 (77.8%) children. A third  
 204 heart sound (S3 gallop) was present in 5 (12.8%) children. Almost all children (97.4%) had a  
 205 significant murmur on cardiac auscultation. [Table 5]

206 Table 4 Cardiac examination findings of RHD patients

|                                 |                                  | <b>Freq.</b> | <b>Percent</b> |
|---------------------------------|----------------------------------|--------------|----------------|
| <b>Point of Maximum impulse</b> | Normal position                  | 9            | 23.08          |
|                                 | On left lower sternal            | 2            | 5.13           |
|                                 | Deviated to left and/or downward | 28           | 71.79          |
|                                 | Total                            | 39           | 100            |
| <b>Apical Heave</b>             | Yes                              | 24           | 61.54          |
|                                 | No                               | 15           | 38.46          |
|                                 | Total                            | 39           | 100            |

|                          |       |    |       |
|--------------------------|-------|----|-------|
| <b>Parasternal heave</b> | Yes   | 22 | 56.41 |
|                          | No    | 17 | 43.59 |
|                          | Total | 39 | 100   |
| <b>S3 gallop</b>         | Yes   | 5  | 12.82 |
|                          | No    | 34 | 87.18 |
|                          | Total | 39 | 100   |

207

### 208 **Abdomen and integumentary examination**

209 Hepatomegaly was present in 17 (43.6%) children, while ascites (fluid collection in the  
210 abdomen) was detected in 14 (35.9%). Peripheral edema was observed in 8 (20.5%).

### 211 **Laboratory findings**

212 Laboratory analysis revealed the following: mean hemoglobin (Hb) concentration was 10.29  
213 g/dL (SD  $\pm$  2.67 g/dL; range, 3.9-17.6 g/dL), mean erythrocyte sedimentation rate (ESR) was 45  
214 mm/hr (SD  $\pm$  33.58 mm/hr; range, 1-140 mm/hr), and mean serum creatinine level was 0.53  
215 mg/dL (SD  $\pm$  0.265 mg/dL; range, 0.1-1.1 mg/dL).

### 216 **Chest x ray findings**

217 Chest X-ray revealed abnormal findings in a significant proportion of participants. Left atrial  
218 enlargement was the most frequent abnormality, observed in 86.1% (31/36) of patients. Other  
219 findings included cardiomegaly (80.6%), pulmonary edema (26.5%), signs suggestive of  
220 pulmonary arterial hypertension (PAH; 36.7%), and pleural effusion (24.2%). [Table 6]

221 Table 6 Chest X-Ray Findings of RHD patients

| Chest X-Ray Finding                                       | Frequency (%) | Number of Patients (n=36) |
|-----------------------------------------------------------|---------------|---------------------------|
| Left Atrial Enlargement (LAE)                             | 86.1          | 31                        |
| Cardiomegaly                                              | 80.6          | 29                        |
| Pulmonary Edema (PE)                                      | 26.5          | 9                         |
| Signs suggestive of Pulmonary Arterial Hypertension (PAH) | 36.7          | 11                        |
| Pleural Effusion                                          | 24.2          | 8                         |
| Pneumonia                                                 | 21.2          | 7                         |

222

### 223 **Echocardiographic Findings in RHD Patients**

224 Echocardiography revealed significant valvular involvement in a vast majority of patients with  
 225 RHD. All 39 patients had evidence of mitral valve involvement. The most frequent finding was  
 226 mitral regurgitation (MR), present in 37 patients (94.9%). The severity of MR varied: 3 patients  
 227 (7.7%) had mild MR, 7 patients (17.9%) had moderate MR, and 27 patients (69.2%) had severe  
 228 MR. Mitral stenosis (MS) was identified in a subset of patients (22/39, 56.4%). The severity of  
 229 MS also varied: 9 patients (23.1%) had mild MS, 6 patients (15.4%) had moderate MS, and 7  
 230 patients (17.9%) had severe MS. Notably, 20 patients (51.3%) had both MR and MS present  
 231 concurrently. However, it's important to note that 2 patients (5.1%) had isolated MS without MR.

232 [Table 7]

233 Table 7 Mitral Valve Findings (n=39)

| Feature                          | Frequency | Percent (%) |
|----------------------------------|-----------|-------------|
| <b>Mitral Regurgitation (MR)</b> |           |             |
| No                               | 2         | 5.13        |

|                             |    |       |
|-----------------------------|----|-------|
| Mild                        | 3  | 7.69  |
| Moderate                    | 7  | 17.95 |
| Severe                      | 27 | 69.23 |
| <b>Mitral Stenosis (MS)</b> |    |       |
| No                          | 17 | 43.59 |
| Mild                        | 9  | 23.08 |
| Moderate                    | 6  | 15.38 |
| Severe                      | 7  | 17.95 |
| <b>Combined MR &amp; MS</b> | 20 | 51.3  |

234

235 A substantial portion of patients (26 out of 39, or 66.7%) had aortic valve involvement. Similar  
 236 to the mitral valve, the severity of aortic regurgitation (AR) varied. Fourteen patients (35.9%)  
 237 had mild AR, 11 patients (28.2%) had moderate AR, and only 1 patient (2.6%) had severe AR.  
 238 Interestingly, only 1 patient (2.6%) had aortic stenosis (AS), and it was severe. It's important to  
 239 note that this severe AS co-existed with MR, highlighting a potential link between these valve  
 240 dysfunctions in some cases. [Table 8]

241 Table 8 Aortic Valve Findings (n=39)

| Feature                          | Frequency | Percent (%) |
|----------------------------------|-----------|-------------|
| <b>Aortic Regurgitation (AR)</b> |           |             |
| No                               | 13        | 33.33       |
| Mild                             | 14        | 35.9        |
| Moderate                         | 11        | 28.21       |
| Severe                           | 1         | 2.56        |

|                      |    |       |
|----------------------|----|-------|
| Aortic Stenosis (AS) |    |       |
| No                   | 38 | 97.44 |
| Severe               | 1  | 2.56  |

242

243 Pulmonic valve involvement was less frequent compared to the mitral and aortic valves. Only 7  
244 patients (17.9%) had pulmonic regurgitation, and no patients had pulmonic stenosis.

245 The pressure gradient measured across the tricuspid valve averaged 27.17 mmHg, with some  
246 variation (standard deviation of 19.734 mmHg).

247 Right atrial size varied among patients. Normal size was observed in nearly 40% (15 patients),  
248 while mild, moderate, and severe dilation were identified in 21%, 37%, and 2.6% of patients,  
249 respectively. Similarly, right ventricular size varied, with normal dimensions in almost half  
250 (47%) of patients. Mild and moderate dilation were seen in 18% and 34% of patients,  
251 respectively. Data for one patient's right ventricle was missing.

252 Left atrial size also showed variation. Most patients had either moderate (47%) or severe (45%)  
253 dilation. Only a small portion (8%) had mildly dilated left atria, and normal size was uncommon  
254 (observed in just 4 patients). Left ventricular size followed a similar pattern, with the majority of  
255 patients having moderate (34%) or severe (39%) dilation. Normal size was seen in less than 20%  
256 of patients, and mild dilation was identified in another 8%.

257 One important finding was the presence of a thrombus in a single patient (2.56%). Notably, left  
258 ventricular function remained normal in all cases, despite the observed chamber size variations.

## 259 **Discussion**

260 This study investigated the clinical characteristics and valve lesion patterns of rheumatic heart  
261 disease (RHD) in a resource-limited setting in Eastern Ethiopia. Our findings offer valuable  
262 insights into the burden and presentation of RHD in this understudied population.

263 The results highlight the persistent burden of RHD, with a majority of affected children being  
264 young and predominantly female. Shortness of breath and cough were the most frequent  
265 presenting symptoms, indicating a significant impact on their quality of life. Furthermore, a  
266 substantial proportion of patients presented with advanced disease, indicated by acute  
267 decompensated heart failure (ADHF) at admission. These observations emphasize the urgent  
268 need for improved strategies for early detection and management of RHD in resource-limited  
269 settings like Eastern Ethiopia. This includes health education initiatives and promoting better  
270 healthcare utilization.

271 Our findings are consistent with previous studies in Ethiopia and other low-resource settings,  
272 which consistently report a high burden of RHD in children, often presenting at advanced  
273 stages(6, 9, 11, 12, 15). The predominance of mitral regurgitation and aortic regurgitation as the  
274 most prevalent valve lesions aligns with existing literature, underlining the extensive valvular  
275 damage associated with pediatric RHD(9, 15, 16). However, this study provides novel insights  
276 into the specific clinical characteristics and prevalent valve lesions in Eastern Ethiopia,  
277 contributing to a more comprehensive understanding of RHD epidemiology in this region.

278 The high prevalence of ADHF and significant valvular involvement observed in our study have  
279 significant implications for clinical practice and public health policies in Ethiopia. Healthcare  
280 providers need to be alert for symptoms suggestive of RHD, particularly in children from



281 vulnerable populations. Early screening and diagnosis should be prioritized to facilitate timely  
282 intervention. Additionally, efforts to improve access to secondary prophylaxis and implement  
283 comprehensive RHD control programs are crucial to reduce disease burden and improve long-  
284 term outcomes for affected children. These findings underscore the need for multidisciplinary  
285 collaboration between healthcare professionals, policymakers, and community stakeholders. This  
286 collaboration is essential to develop and implement effective strategies for RHD prevention,  
287 diagnosis, and management in resource-limited settings.

### 288 **Limitations**

289 Several limitations should be considered when interpreting the findings of this study. Firstly, the  
290 relatively small sample size and single-center design may limit the generalizability of our results  
291 to other settings within Ethiopia and beyond. Furthermore, the lack of long-term follow-up data  
292 precludes a comprehensive assessment of treatment outcomes and disease progression in this  
293 population. Future studies with larger sample sizes, prospective designs, and longer follow-up  
294 periods are needed to address these limitations and provide a more robust understanding of RHD  
295 epidemiology and outcomes in Eastern Ethiopia.

### 296 **Conclusion:**

297 In conclusion, this study provides valuable insights into the clinical characteristics and valve  
298 lesions in RHD among children in Eastern Ethiopia. The findings underscore the persistent  
299 burden of RHD in this region and highlight the urgent need for improved early detection,  
300 diagnosis, and management strategies. Healthcare providers, policymakers, and researchers must  
301 collaborate to develop and implement comprehensive RHD control programs tailored to the  
302 unique challenges faced by resource-limited settings like Eastern Ethiopia. By addressing these

303 challenges and prioritizing RHD prevention and management, we can mitigate the morbidity and  
304 mortality associated with this preventable yet devastating disease among vulnerable pediatric  
305 populations.

## 306 **Data Sharing Statement**

307 Any of the data used for analysis in the study is available from the corresponding author and  
308 ready to be provided up on reasonable request.

## 309 **Contributors**

310 Conceptualization: Temesgen T Libe, Yunus E Kelil, Samrawit Abebaw, Faisel, and Kibrom  
311 Mesfin; formal analysis: Temesgen T Libe, Faisel, and Yunus E Kelil; investigation: Temesgen  
312 T Libe, Faisel, Yunus E Kelil, Samrawit Abebaw, and Kibrom; methodology: Temesgen T Libe,  
313 Faisel, and Kibrom; Validation: Temesgen T Libe, Faisel, and Kibrom, Yunus E Kelil and  
314 Samrawit Abebaw; writing the original draft: Temesgen T Libe, and Samrawit Abebaw.

## 315 **Acknowledgments**

316 We are very grateful to the Haramaya University College of Health and Medical Sciences for its  
317 ethical clearance provision and financial support. We also acknowledge our study participants,  
318 data collectors and supervisors for enabling us to realize this research work.

## 319 **Funding**

320 The thesis was funded by Haramaya University.

321 **Disclosure**

322 The authors declared that they have no conflicts of interest.

## 323 **References**

- 324 1. Kliegman RM, St Geme, J. W. Nelson Textbook of Pediatrics E-Book: Elsevier Health  
325 Sciences; 2019.
- 326 2. Watkins DA, Johnson CO, Colquhoun SM, Karthikeyan G, Beaton A, Bukhman G, et al.  
327 Global, Regional, and National Burden of Rheumatic Heart Disease, 1990-2015. *N Engl J Med.*  
328 2017;377(8):713-22.
- 329 3. Cilliers AM. Rheumatic fever and rheumatic heart disease in Africa. *S Afr Med J.*  
330 2015;105(5):361-2.
- 331 4. Arvind B, Ramakrishnan S. Rheumatic Fever and Rheumatic Heart Disease in Children.  
332 *Indian J Pediatr.* 2020;87(4):305-11.
- 333 5. Carapetis JR, Beaton A, Cunningham MW, Guilherme L, Karthikeyan G, Mayosi BM, et  
334 al. Acute rheumatic fever and rheumatic heart disease. *Nat Rev Dis Primers.* 2016;2:15084.
- 335 6. Zühlke L, Engel ME, Karthikeyan G, Rangarajan S, Mackie P, Cupido B, et al.  
336 Characteristics, complications, and gaps in evidence-based interventions in rheumatic heart  
337 disease: the Global Rheumatic Heart Disease Registry (the REMEDY study). *Eur Heart J.*  
338 2015;36(18):1115-22a.
- 339 7. Condemi F, Rossi G, Lupiz M, Pagano A, Zamatto F, Marini S, et al. Screening of  
340 asymptomatic rheumatic heart disease among refugee/migrant children and youths in Italy. *Pediatr*  
341 *Rheumatol Online J.* 2019;17(1):12.
- 342 8. Roberts K, Cannon J, Atkinson D, Brown A, Maguire G, Remenyi B, et al.  
343 Echocardiographic Screening for Rheumatic Heart Disease in Indigenous Australian Children: A  
344 Cost-Utility Analysis. *J Am Heart Assoc.* 2017;6(3).

- 345 9. Sani MU, Karaye KM, Borodo MM. Prevalence and pattern of rheumatic heart disease in  
346 the Nigerian savannah: an echocardiographic study. *Cardiovasc J Afr.* 2007;18(5):295-9.
- 347 10. Karthikeyan G, Connolly SJ, Ntsekhe M, Benz A, Rangarajan S, Lewis G, et al. The  
348 INVICTUS rheumatic heart disease research program: Rationale, design and baseline  
349 characteristics of a randomized trial of rivaroxaban compared to vitamin K antagonists in  
350 rheumatic valvular disease and atrial fibrillation. *Am Heart J.* 2020;225:69-77.
- 351 11. Animasahun BA, Madise Wobo AD, Itiola AY, Adekunle MO, Kusimo OY, Thomas FB.  
352 The burden of rheumatic heart disease among children in Lagos: how are we fairing? *Pan Afr Med*  
353 *J.* 2018;29:150.
- 354 12. Marijon E, Ou P, Celermajer DS, Ferreira B, Mocumbi AO, Jani D, et al. Prevalence of  
355 rheumatic heart disease detected by echocardiographic screening. *N Engl J Med.* 2007;357(5):470-  
356 6.
- 357 13. Guilherme L, Cury P, Demarchi LM, Coelho V, Abel L, Lopez AP, et al. Rheumatic heart  
358 disease: proinflammatory cytokines play a role in the progression and maintenance of valvular  
359 lesions. *Am J Pathol.* 2004;165(5):1583-91.
- 360 14. Guilherme L, Köhler KF, Postol E, Kalil J. Genes, autoimmunity and pathogenesis of  
361 rheumatic heart disease. *Ann Pediatr Cardiol.* 2011;4(1):13-21.
- 362 15. Tantchou Tchoumi JC, Butera G. Rheumatic valvulopathies occurrence, pattern and follow-  
363 up in rural area: the experience of the Shisong Hospital, Cameroon. *Bull Soc Pathol Exot.*  
364 2009;102(3):155-8.
- 365 16. Koirala PC, Sah RK, Sharma D. Pattern of rheumatic heart disease in patients admitted at  
366 tertiary care centre of Nepal. *Nepalese Heart Journal.* 2018;15(1):29-33.

367
